# Supplementary material for: A Guide for Selection of Genetic Instruments in Mendelian randomisation (MR) studies of Type-2 diabetes and HbA1c: towards an integrated approach
Source: PubMed Central journal article supplement (PMC7614590; doi:10.2337/db22-0110), 2023-02-01
Supplement: EMS175064-supplement-Supplementary_material.pdf [file EMS175064-supplement-Supplementary_material.pdf]

## Supplemental material S1

### Search strategy

#### *Diabetes searches in PubMed*

We conducted searches in PubMed using the following terms, until March 2021: "mendelian randomization"[Title/Abstract] AND "diabetes"[Title/Abstract], and "diabetes"[Title/Abstract] AND "mendelian randomisation"[Title/Abstract].

#### *HbA<sub>1c</sub> searches in PubMed*

We conducted the following searches for HbA<sub>1c</sub> MR studies: (((HbA1c) AND (Mendelian randomization)) OR (HbA1c) AND (Mendelian randomisation)); (("HbA1c"[Title/Abstract] AND "mendelian randomisation"[Title/Abstract]) OR "HbA1c"[Title/Abstract]) AND "mendelian randomization"[Title/Abstract]; and (("glycated haemoglobin"[Title/Abstract] AND "mendelian randomisation"[Title/Abstract]) OR "glycated haemoglobin"[Title/Abstract]) AND "mendelian randomization"[Title/Abstract].

#### *Additional searches in Web of Science*

After screening it was found that all studies had either been identified through the PubMed search or were not appropriate for inclusion due to having not instrumented diabetes. The search for diabetes was: TITLE: (diabetes\* AND Mendelian randomisation). Refined by: DOCUMENT TYPES: ( ARTICLE ). For HbA<sub>1c</sub> it was: TITLE: (HbA1c\* AND Mendelian randomisation). Refined by: DOCUMENT TYPES: ( ARTICLE ). After filtering out conference abstracts there was only one article that had already been identified in the PubMed search.

Figure 1. Flowchart for diabetes literature search (using PRISMA guidelines)

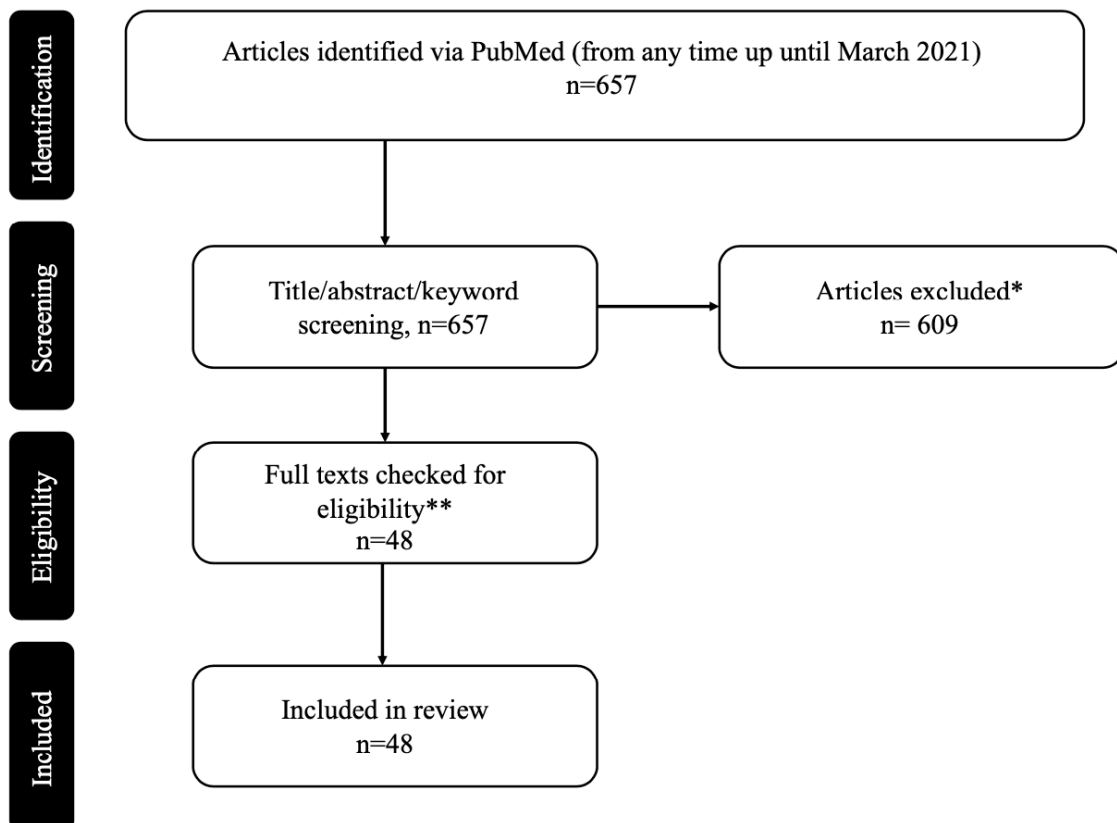

*Note.* \*Excluded because it was evident from the title/abstract/keywords that they did not instrument diabetes as an exposure or because it was a duplicate; \*\*confirmation that diabetes was instrumented using MR and that details were provided on the number of SNPs used and details of which GWAS they were discovered in.

Figure 2. Flowchart for HbA<sub>1c</sub> literature search (using PRISMA guidelines)

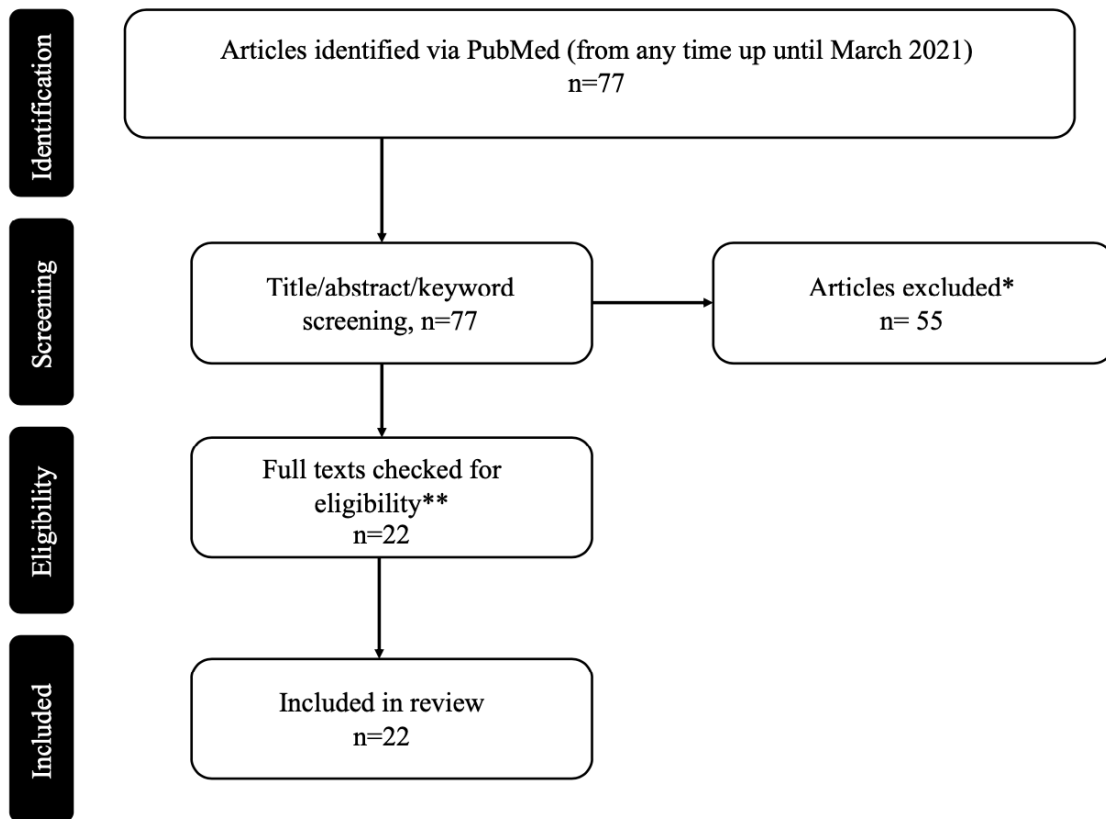

Note. \*Excluded because it was evident from the title/abstract/keywords that they did not instrument HbA<sub>1c</sub> as an exposure or because it was a duplicate.; \*\*confirmation that HbA<sub>1c</sub> was instrumented using MR and that details were provided on the number of SNPs used and details of which GWAS they were discovered in.

Table 1. MR studies until March 2021 that used diabetes as an (genetically instrumented) exposure

| <b>First author (year)</b> | <b>PubMed ID</b> | <b>Outcome</b>                                          |
|----------------------------|------------------|---------------------------------------------------------|
| Ahmad (2015)               | 26017687         | Coronary Heart Disease (CHD)                            |
| Walter (2016)              | 26650880         | Alzheimer's dementia (AD)                               |
| Xu (2016)                  | 26953161         | Arterial stiffness                                      |
| Xu (2016)                  | 27211558         | Renal function & albuminuria                            |
| Ahmad (2017)               | 27982478         | Bone mineral density                                    |
| Carreras-Torres (2017)     | 28954281         | Pancreatic cancer                                       |
| Gan (2017)                 | 28989980         | Bone mineral density                                    |
| Hagenaars (2017)           | 28572633         | Cognitive ability                                       |
| Larsson (2017)             | 28667182         | Stroke                                                  |
| Van 't Hof (2017)          | 28378816         | Intracranial and abdominal aortic aneurysms             |
| Disney-Hogg (2018)         | 29531326         | Glioma                                                  |
| Wang (2018)                | 29506267         | Lipid profiles                                          |
| Xuan (2018)                | 30446878         | Depression                                              |
| Beijer (2019)              | 31446444         | Plasma proteins                                         |
| Bovijn (2019)              | 30583798         | Erectile dysfunction                                    |
| Funck-Brentano (2019)      | 31099188         | Osteoarthritis                                          |
| Marouli (2019)             | 30937401         | CAD                                                     |
| Sun (2019)                 | 30646822         | Hypertension                                            |
| Yarmolinsky (2019)         | 31390370         | Epithelial ovarian cancer                               |
| Yeung (2019)               | 31908803         | Cancers                                                 |
| Yeung (2019)               | 30798333         | Lean mass/grip strength                                 |
| Zeng (2019)                | 31796040         | Amyotrophic lateral sclerosis (ALS)                     |
| Bell (2020)                | 32345654         | NMR metabolites                                         |
| Gill (2020)                | 33391794         | Lung ACE2 and TMPRSS2 expression and ACE2 plasma levels |
| Goto (2020)                | 30927373         | Cancer risk                                             |
| Elhadad (2020)             | 32928870         | Plasma proteins                                         |
| Gudmundsdottir (2020)      | 32385057         | Serum proteins                                          |
| Harrison (2020)            | 32808034         | Social and SES outcomes                                 |
| Inamo (2020)               | 32901113         | Rheumatoid arthritis                                    |
| Kwok (2020)                | 33243239         | Cortisol                                                |
| Lu (2020)                  | 32066631         | Pancreatic cancer                                       |
| Pan (2020)                 | 33202379         | AD                                                      |
| Parisinos (2020)           | 32247823         | Liver cT1 measures                                      |
| Rao (2020)                 | 32430459         | ACE2 expression                                         |
| Smit (2020)                | 31801993         | Statin-induced LDL cholesterol response                 |
| Tang (2020)                | 32270255         | Major depressive disorder (MDD)                         |
| Thomassen (2020)           | 32326995         | Dementia                                                |
| Van Oort (2020)            | 33131310         | Hypertension                                            |
| Wang (2020)                | 31076857         | Vitamin D                                               |
| Yuan (2020)                | 32349989         | Cancers (x22)                                           |
| Andrews (2021)             | 32996171         | Alzheimer's phenome                                     |
| Cui (2021)                 | 33519901         | Osteoarthritis                                          |
| Jones (2021)               | 33510174         | Muscle weakness                                         |
| Peters (2021)              | 33277303         | CHD                                                     |
| Molina-Montes (2021)       | 32409590         | Pancreatic cancer                                       |
| Van Oort (2021)            | 33107078         | Longevity                                               |
| Yuan (2021)                | 33418132         | Gallstone disease                                       |
| Yuan (2021)                | 32728946         | Multiple sclerosis                                      |

Table 2. MR studies until March 2021 that used HbA<sub>1c</sub> as an (genetically instrumented) exposure

| <b>First author (year)</b> | <b>PubMed ID</b> | <b>Outcome</b>                           |
|----------------------------|------------------|------------------------------------------|
| Yeung (2018)               | 29950300         | CVD                                      |
| Hsiung (2020)              | 31784746         | Circulating triglycerides                |
| Jia (2019)                 | 30940890         | Triglycerides, Total and LDL cholesterol |
| Leong (2019)               | 30659074         | CAD                                      |
| Liu (2019)                 | 31130989         | CKD                                      |
| Aung (2020)                | 33262790         | COVID-19 susceptibility                  |
| Dikilitas (2020)           | 33287626         | Peripheral artery disease                |
| Hu (2020)                  | 32523662         | CHD                                      |
| Jin (2020)                 | 33408737         | Vascular outcomes                        |
| Yeung (2020)               | 31386636         | Hypertension                             |
| Zhao (2020)                | 32409868         | Kidney function                          |
| Burgess (2021)             | 33495845         | Incident CHD                             |
| Juvinao-Quintero (2021)    | 33406918         | Cord blood DNA                           |
| Saunders (2021)            | 33020596         | Glioma                                   |
